# Supplementary material for: Organophosphorus Flame Retardants: A Global Review of Indoor Contamination and Human Exposure in Europe and Epidemiological Evidence
Source: PubMed Central journal article supplement (PMC7558007; doi:10.3390/ijerph17186713), 2020-09-15
Supplement: ijerph-17-06713-s001.pdf [file ijerph-17-06713-s001.pdf]

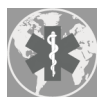

**Supplementary Table S1.** OPFRs abbreviation.

| CAS Number | Used Acronym | Commonly Used Acronym           | International Name                                    | Metabolite Used Acronym | Metabolite Commonly Used Acronym | International Name                            | Others Metabolite  |
|------------|--------------|---------------------------------|-------------------------------------------------------|-------------------------|----------------------------------|-----------------------------------------------|--------------------|
| 38051-10-4 | BCMP-BCEP    | V6, TCDDP                       | Tetrakis (2-chlorethyl) dichloroisopentyl diphosphate |                         |                                  |                                               |                    |
| 5945-33-5  | BDP          | BADP, BAPP, BPADP, BPA-BDPP     | Bisphenol-A diphenyl phosphate                        |                         |                                  |                                               |                    |
| 2752-95-6  | BdPhP        |                                 | Butyl diphenyl phosphate                              |                         |                                  |                                               |                    |
| 2528-36-1  | dBPhP        |                                 | Dibutyl phenyl phosphate                              |                         |                                  |                                               |                    |
| 838-85-7   | DPP          | DPK                             | Diphenylphosphate                                     |                         |                                  |                                               |                    |
| 1241-94-7  | EHDPP        | EDP, EHDP, EHDPP, DPEHP, EHDPHP | Ethylhexyldiphényl phosphate                          |                         |                                  |                                               | 5-HO-EHDPHP, EHPHP |
| 29761-21-5 | iDDPHP       | IDDP, IDPP                      | Isodecyldiphenylphosphate                             |                         |                                  |                                               |                    |
| 249-828-6  | iDPP         |                                 | Isodecyl diphenyl phosphate                           |                         |                                  |                                               |                    |
|            | IIP          | IPTP, IPTPP                     | Isopropylated triarylphosphate esters                 | IP-PPP                  |                                  | Isopropylphenyle phenyl phosphate             | tb-PPP             |
| 57583-54-7 | PBDPP        | RDP                             | Resorcinol-bis (diphenyl) phosphate                   |                         |                                  |                                               |                    |
| 78-51-3    | TBOEP        | TBEP, TBXP                      | Tris (2-butoxyethyl) phosphate                        | BBOEP                   |                                  | Bis(2-butoxyethyl) phosphate                  | 3-HO-TBEP          |
|            |              |                                 |                                                       | BBOEHEP                 |                                  | Bis(2-butoxyethyl)-(2-hydroxyethyl) phosphate |                    |
|            |              |                                 |                                                       | DBOEP                   | DBEP                             | Di-(2-butoxyethyl) phosphate                  |                    |
| 78-33-1    | TBPP         | TBDP                            | Tris (p-t-butylphenyl) phosphate                      |                         |                                  |                                               |                    |
| 115-96-8   | TCEP         |                                 | Tris (2-chloroethyl) phosphate                        | BCEP                    |                                  | Bis-(2-chlorethyl)-phosphate                  | uTCEP              |
|            |              |                                 |                                                       | DCEP                    |                                  | Di-(2-chloroethyl) phosphate                  |                    |
| 13674-84-5 | TCIPP        | TCPP, TCiPP                     | Dris(2-chloroisopropyl)phosphate                      | BCIPP                   | BCPP                             | Bis(1-chloro-2-propyl) phosphate              | BCIPHIPP           |
|            |              |                                 |                                                       | DCIPP                   | DCPP                             | Di-(2-chloroisopropyl) phosphate              |                    |
| 126-72-7   | TDBPP        | TDBP, TDB99                     | Tris (2,3-Dibromopropyl) phosphate                    |                         |                                  |                                               |                    |
| 13674-87-8 | TDCIPP       | TDCPP, TDCiPP                   | Tris(1,3-dichloro-2-propyl) phosphate                 | BDCIPP                  | BDCPP                            | Bis(1,3-dichloro-2-propyl) phosphate          |                    |
| 78-42-2    | TEHP         | TOF, TOP                        | Tris (2-ethylhexyl) phosphate                         | DEHP                    |                                  | Diethylhexyl phosphate                        | BEHP               |
| 78-40-0    | TEP          |                                 | Triethyphosphate                                      | DEP                     |                                  | Diethyl phosphate                             |                    |
| 2528-39-4  | THP          |                                 | Trihexyl phosphate                                    |                         |                                  |                                               |                    |
| 2528-39-4  | THP          |                                 | Trihexyl phosphate                                    |                         |                                  |                                               |                    |
| 126-71-6   | TIBP         | TiBP, TIP                       | Tri-iso-butylphosphate                                |                         |                                  |                                               |                    |
| 513-02-0   | TIPP         | TIPrP, TiPP, TiPrP              | Tri-isopropylphosphate                                |                         |                                  |                                               |                    |
| 64532-95-2 | TiPPP        | o-IPP, T2IPPP                   | Phenol isopropylated phosphate, ortho                 |                         |                                  |                                               |                    |
| 563-04-2   | TmCP         |                                 | Tri-m-cresylphosphate                                 | DmCP                    |                                  | Di-m-cresyl phosphate                         |                    |
| 512-56-1   | TMP          | TMPA, TMPO                      | Trimethylphosphate                                    |                         |                                  |                                               |                    |

|            |      |                                |                                      |      |     |  |  |  |  |                                 |
|------------|------|--------------------------------|--------------------------------------|------|-----|--|--|--|--|---------------------------------|
| 1330-78-5  | TMPP | TCrP, TTOP, TTP, TBT, TCP, TBT | Tricresylphosphate (mixture o, m, p) |      |     |  |  |  |  | DMPP                            |
| 126-73-8   | TNBP | TnBP, TBP, TB                  | Tri-n-butylphosphate                 | DnBP | DBP |  |  |  |  | Di-n-butyl phosphate            |
| 78-30-8    | ToCP | TOCP, TOTP, o-TCP, o-TMPP      | Tri-o-cresylphosphate                | DoCP |     |  |  |  |  | Di-o-cresyl phosphate           |
| 78-32-0    | TpCP | TPCP, p-TCP                    | Tri-p-cresylphosphate                | DpCP |     |  |  |  |  | Di-p-cresyl phosphate           |
| 2528-38-3  | TPEP |                                | Triphenylphosphate                   |      |     |  |  |  |  |                                 |
| 115-86-6   | TPHP | TPP, TPhP                      | Triphenylphosphate                   | DPHP | DPP |  |  |  |  | Diphenyl phosphate              |
| 513-08-6   | TPP  | TnPP, TPrP, TPPO, TnPrP        | Tri-n-propylphosphate                |      |     |  |  |  |  | 4-HO-DPHP, 3-HO-TPHP, 4-HO-TPHP |
| 25653-16-1 | TXP  | TDMPP                          | Tris(3,5-xilylenyl)phosphate         |      |     |  |  |  |  |                                 |

Supplementary Table S2. Concentrations of OPFRs in indoor dust (µg/g), Europe, 2000-2018.

| CAS number | Abbreviation      | Period          | Country             | Sampling Location                                       | Sample Size | Min.    | Max.  | Mean              | Median | References                |
|------------|-------------------|-----------------|---------------------|---------------------------------------------------------|-------------|---------|-------|-------------------|--------|---------------------------|
| 38051-10-4 | BCMP-BCEP         | 2013            | UK                  | Homes                                                   | 10          | 0       | 0.76  | 0.1               | 0.02   | Kademoglou et al.,2017    |
|            |                   | 2013-2014       | Norway              | Homes                                                   | 10          | 0       | 0.01  | 0                 | 0      | Kademoglou et al.,2018    |
|            |                   | -               | Greece              | Cars                                                    | 25          | 0       | 8.54  | 0.68              | 0.01 * | Christia et al.,2018      |
| 5945-33-5  | BDP               | 2013            | UK                  | Homes                                                   | 10          | <0.0034 | 0.49  | 0.12              | 0.07   | Kademoglou et al.,2017    |
|            |                   | 2013-2014       | Norway              | Homes                                                   | 10          | <0.0034 | 0.7   | 0.12              | -      | Kademoglou et al.,2017    |
|            |                   | -               | Greece              | Cars                                                    | 25          | 0       | 0.42  | 0.04              | 0.02 * | Christia et al.,2018      |
| 838-85-7   | DPP               | 2016            | The netherlands     | Homes (on top of electronics)                           | 11          | 0.22    | 6.59  | 2.78              | 2.58   | Björnsdotter et al., 2018 |
|            |                   | 2016            | The netherlands     | Homes and Offices                                       | 12          | 0.15    | 4.19  | 1.2               | 0.74   | Björnsdotter et al., 2018 |
|            |                   | 2017            | Spain               | Cars                                                    | 15          | 0.92    | 79.66 | 8.29              | 2.31   | Björnsdotter et al., 2018 |
|            |                   | 2017            | Spain               | Homes (on top of electronics)                           | 13          | 0.3     | 21.9  | 3.21              | 1.75   | Björnsdotter et al., 2018 |
| 1241-94-7  | EHDPP             | 2008            | Danmark (Odense)    | Daycare centers (shelves,ledges,windows sills)          | 151         | <0.14   | 540   | -                 | 2.1    | Langer et al.,2016        |
|            |                   | 2008            | Danmark (Odense)    | Homes (children bedroom's,shelves,ledges,windows sills) | 497         | <0.14   | 11    | -                 | <014   | Langer et al.,2016        |
|            |                   | 2008            | Swenden (Stockolm)  | Homes                                                   | 62          | <0.23   | 20    | -                 | 2.7    | Luongo and Östman.,2016   |
|            |                   | 2010-2011       | Portugal            | Homes                                                   | 28          | 0.15    | 7.2   | 1.1               | 0.62   | Coelho et al.,2016        |
|            |                   | 2011-2012       | Germany             | Dayecare centers                                        | 63          | 0.3     | 95.6  | 4.13              | 1.1    | Fromme et al.,2014        |
|            |                   | 2011-2012       | Germany             | Cars                                                    | 19          | 0.01    | 1.8   | -                 | 1.2    | Harrad et al.,2016        |
|            |                   | 2011-2012       | Germany             | Homes (living rooms)                                    | 22          | <0.01   | 0.56  | -                 | 0.14   | Harrad et al.,2016        |
|            |                   | 2011-2012       | Germany             | Offices                                                 | 25          | 0.13    | 3.8   | -                 | 0.36   | Harrad et al.,2016        |
|            |                   | 2011-2012       | UK ( West Midlands) | Cars                                                    | 21          | 0.29    | 11    | 2.9               | 2.2    | Brommer and Harrad.,2015  |
|            |                   | 2011-2012       | UK ( West Midlands) | Classroom                                               | 28          | 0.3     | 470   | 50                | 29     | Brommer and Harrad.,2015  |
|            |                   | 2011-2012       | UK ( West Midlands) | Homes (living room)                                     | 32          | 0.18    | 130   | 2.6               | 1.6    | Brommer and Harrad.,2015  |
|            |                   | 2011-2012       | UK ( West Midlands) | Offices                                                 | 61          | 0.15    | 0.05  | 81                | 10     | Brommer and Harrad.,2015  |
|            |                   | 2012            | Norway              | Homes                                                   | 48          | -       | 5.9   | 0.88              | 0.62   | Cequier et al.,2014       |
|            |                   | 2013            | Czech Republic      | Homes                                                   | 30          | 0.14    | 8.23  | -                 | 0.84   | Vykoukalová et al.,2017   |
|            |                   | 2013            | UK                  | Homes                                                   | 10          | 0.29    | 9.17  | 3.01              | 2.38   | Kademoglou et al.,2017    |
|            |                   | 2013-2014       | Norway              | Homes                                                   | 10          | 0.04    | 4.01  | 0.74              | 0.2    | Kademoglou et al.,2017    |
| 2013-2014  | Norway (Oslo)     | Homes (floor)   | 61                  | 0.083                                                   | 12.5        | -       | 0.42  | Xu et al.,2016    |        |                           |
| 2013-2014  | Norway (Oslo)     | Homes (surface) | 61                  | 0.212                                                   | 30.2        | -       | 0.455 | Xu et al.,2016    |        |                           |
| -          | Sweden (Stockolm) | Daycare center  | 10                  | 0.2                                                     | 160         | 24      | 0.8   | Bergh et al.,2011 |        |                           |

|            |        |           |                           |                                                         |     |         |         |         |         |                          |
|------------|--------|-----------|---------------------------|---------------------------------------------------------|-----|---------|---------|---------|---------|--------------------------|
|            |        | -         | Sweden (Stockolm)         | Homes                                                   | 10  | N.D     | 1.8     | 0.6     | 0.5     | Bergh et al.,2011        |
|            |        | -         | Sweden (Stockolm)         | Offices                                                 | 10  | N.D     | 73      | 15      | 1       | Bergh et al.,2011        |
| 29761-21-5 | iDDPHP | -         | Greece                    | Cars                                                    | 25  | 0.04    | 4.63    | 0.36    | 0.12 *  | Christia et al.,2018     |
| 249-828-6  | iDPP   | 2013      | UK                        | Homes                                                   | 10  | 0.11    | 1.69    | 0.62    | 0.4     | Kademoglou et al.,2017   |
|            |        | 2013–2014 | Norway                    | Homes                                                   | 10  | 0.01    | 0.26    | 0.08    | 0.05    | Kademoglou et al.,2017   |
| 57583-54-7 | PBDPP  | 2013      | UK                        | Homes                                                   | 10  | <0.0018 | 0       | 0       | 0       | Kademoglou et al.,2017   |
|            |        | 2013–2014 | Norway                    | Homes                                                   | 10  | <0.0018 | <0.0018 | <0.0018 | <0.0018 | Kademoglou et al.,2017   |
|            |        | -         | Greece                    | Cars                                                    | 25  | 0       | 0.65    | 0.04    | 0.004 * | Christia et al.,2018     |
| 78-51-3    | TBOEP  | 2008      | Swenden (Stockolm)        | Homes                                                   | 62  | <0.20   | 107     | -       | 11      | Luongo and Östman.,2016  |
|            |        | 2008      | Belgium                   | Homes (floor)                                           | 33  | 0.2     | 55.7    | 11.8    | 3.61    | Van den Eede et al.,2011 |
|            |        | 2008      | Belgium                   | Shop                                                    | 15  | 0.2     | 55.7    | 11.8    | 3.61    | Van den Eede et al.,2011 |
|            |        | 2008      | Danmark (Odense)          | Daycare centers (shelves,ledges,windows sills)          | 151 | <0.40   | 11000   | -       | 26      | Langer et al.,2016       |
|            |        | 2008      | Danmark (Odense)          | Homes (children bedroom's,shelves,ledges,windows sills) | 497 | <0.40   | 1300    | -       | <0.40   | Langer et al.,2016       |
|            |        | 2010      | Roumania (Lasi)           | Homes                                                   | 47  | <0.05   | 21      | 2.7     | 1.5     | Dirtu et al.,2012        |
|            |        | 2010–2011 | Germany                   | Cars                                                    | 12  | <0.06   | 74      | 21      | 7.5     | Brommer et al.,2012      |
|            |        | 2010–2011 | Germany                   | Offices                                                 | 10  | 2.9     | 13      | 7       | -       | Brommer et al.,2012      |
|            |        | 2011–2012 | Germany                   | Dayecare centers                                        | 63  | 1.61    | 4711    | 706     | 225     | Fromme et al.,2014       |
|            |        | 2012      | Norway                    | Homes                                                   | 48  | -       | 128     | 18.7    | 13.4    | Cequier et al.,2014      |
|            |        | 2013      | UK                        | Homes                                                   | 10  | 0.23    | 58.75   | 16.08   | 8.07    | Kademoglou et al.,2017   |
|            |        | 2013–2014 | Norway                    | Homes                                                   | 10  | 1.34    | 48.01   | 19.15   | 18.36   | Kademoglou et al.,2017   |
|            |        | 2013–2014 | Norway (Oslo)             | Homes (floor)                                           | 61  | 0.73    | 311     | -       | 8.15    | Xu et al.,2016           |
|            |        | 2013–2014 | Norway (Oslo)             | Homes (surface)                                         | 61  | <0.090  | 540     | -       | 6.8     | Xu et al.,2016           |
|            |        | 2015      | Germany (Rhine/Main area) | Cars                                                    | 11  | 2.3     | 200     | 35      | 7.5     | Zhou et al.,2017         |
|            |        | 2015      | Germany (Rhine/Main area) | Homes                                                   | 15  | 2.1     | 99      | 13      | 4.3     | Zhou et al.,2017         |
|            |        | 2015      | Germany (Rhine/Main area) | Offices                                                 | 11  | 4.8     | 150     | 45      | 8.6     | Zhou et al.,2017         |
|            |        | -         | Greece                    | Cars                                                    | 25  | 0.19    | 9.78    | 1.41    | 0.90 *  | Christia et al.,2018     |
|            |        | -         | Sweden (Stockolm)         | Daycare center                                          | 10  | 31      | 4100    | 1900    | 1600    | Bergh et al.,2011        |
|            |        | -         | Sweden (Stockolm)         | Homes                                                   | 10  | 0.6     | 30      | 8.5     | 4       | Bergh et al.,2011        |
|            |        | -         | Sweden (Stockolm)         | Offices                                                 | 10  | 4.5     | 960     | 250     | 87      | Bergh et al.,2011        |
| 78-33-1    | TBPP   | 2013      | Czech Republic            | Homes                                                   | 30  | 0       | 0.04    | -       | 0.01    | Vykoukalová et al.,2017  |
| 115-96-8   | TCEP   | 2005      | Austria                   | Schools                                                 | 34  | 0.6     | 35      | -       | 2.5     | Huuter et al.,2013       |
|            |        | 2008      | Danmark (Odense)          | Daycare centers (shelves,ledges,windows sills)          | 151 | <0.6    | 1800    | -       | 16      | Langer et al.,2016       |
|            |        | 2008      | Danmark (Odense)          | Homes (children bedroom's,shelves,ledges,windows sills) | 497 | <0.60   | 230     | -       | 6.9     | Langer et al.,2016       |
|            |        | 2008      | Swenden (Stockolm)        | Homes                                                   | 62  | <0.19   | 808     | -       | 4       | Luongo and Östman.,2016  |
|            |        | 2008      | Belgium                   | Homes (floor)                                           | 33  | <0.08   | 2.65    | 0.49    | 0.23    | Van den Eede et al.,2011 |
|            |        | 2008      | Belgium                   | Shop                                                    | 15  | <0.08   | 5.46    | 1.17    | 0.59    | Van den Eede et al.,2011 |
|            |        | 2010      | Roumania (Lasi)           | Homes                                                   | 47  | <0.02   | 1.16    | 0.18    | 0.1     | Dirtu et al.,2012        |
|            |        | 2010–2011 | Germany                   | Cars                                                    | 12  | <0.08   | 5.8     | 0.95    | 0.28    | Brommer et al.,2012      |
|            |        | 2010–2011 | Germany                   | Offices                                                 | 10  | <0.08   | 0.17    | 0.12    | -       | Brommer et al.,2012      |
|            |        | 2010–2011 | Portugal                  | Homes                                                   | 28  | <0.004  | 0.72    | 0.06    | 0.02    | Coelho et al.,2016       |
|            |        | 2011–2012 | UK ( West Midlands)       | Cars                                                    | 21  | <0.06   | 8.7     | 1.95    | 1.23    | Brommer and Harrad.,2015 |
|            |        | 2011–2012 | UK ( West Midlands)       | Classroom                                               | 28  | <0.06   | 8.3     | 1.5     | 0.86    | Brommer and Harrad.,2015 |
|            |        | 2011–2012 | UK ( West Midlands)       | Homes (living room)                                     | 32  | <0.06   | 28      | 2.2     | 0.81    | Brommer and Harrad.,2015 |

|            |       |           |                           |                                                         |     |        |       |      |        |                          |
|------------|-------|-----------|---------------------------|---------------------------------------------------------|-----|--------|-------|------|--------|--------------------------|
|            |       | 2011–2012 | UK ( West Midlands)       | Offices                                                 | 61  | <0.06  | 160   | 5    | 0.87   | Brommer and Harrad.,2015 |
|            |       | 2011–2012 | Germany                   | Daycare centers                                         | 63  | 0.1    | 8.3   | 1.35 | 0.4    | Fromme et al.,2014       |
|            |       | 2011–2012 | Germany                   | Cars                                                    | 19  | <0.06  | 5.1   | -    | 0.4    | Harrad et al.,2016       |
|            |       | 2011–2012 | Germany                   | Homes (living rooms)                                    | 22  | <0.06  | 5.7   | -    | 0.21   | Harrad et al.,2016       |
|            |       | 2011–2012 | Germany                   | Offices                                                 | 25  | <0.06  | 12    | -    | 0.13   | Harrad et al.,2016       |
|            |       | 2012      | Norway                    | Homes                                                   | 48  | -      | 4.63  | 0.8  | 0.41   | Cequier et al.,2014      |
|            |       | 2013      | UK                        | Homes                                                   | 10  | 0.14   | 6.27  | 1.57 | 0.87   | Kademoglou et al.,2017   |
|            |       | 2013      | Czech Republic            | Homes                                                   | 30  | 0.04   | 1.68  | -    | 0.16   | Vykoukalová et al.,2017  |
|            |       | 2013–2014 | Norway                    | Homes                                                   | 10  | 0.06   | 0.5   | 0.74 | 0.2    | Kademoglou et al.,2017   |
|            |       | 2013–2014 | Norway (Oslo)             | Homes (floor)                                           | 61  | <0.170 | 350   | -    | 0.435  | Xu et al.,2016           |
|            |       | 2013–2014 | Norway (Oslo)             | Homes (surface)                                         | 61  | <0.170 | 15.2  | -    | 0.455  | Xu et al.,2016           |
|            |       | 2013–2015 | Netherlands               | Homes (playroom)                                        | 50  | 0.02   | 5.66  | -    | 0.16   | Sugeng et al.2018        |
|            |       | 2015      | Germany (Rhine/Main area) | Cars                                                    | 11  | <LOD   | 170   | 18   | 1.4    | Zhou et al.,2017         |
|            |       | 2015      | Germany (Rhine/Main area) | Homes                                                   | 15  | <LOD   | 5     | 1.3  | 1.1    | Zhou et al.,2017         |
|            |       | 2015      | Germany (Rhine/Main area) | Offices                                                 | 11  | 0.93   | 18    | 3.7  | 1.9    | Zhou et al.,2017         |
|            |       | -         | Sweden (Stockolm)         | Daycare center                                          | 10  | 2.5    | 150   | 51   | 30     | Bergh et al.,2011        |
|            |       | -         | Sweden (Stockolm)         | Homes                                                   | 10  | N.D    | 33    | 7.6  | 2.1    | Bergh et al.,2011        |
|            |       | -         | Sweden (Stockolm)         | Offices                                                 | 10  | 1.3    | 260   | 36   | 6.7    | Bergh et al.,2011        |
|            |       | -         | Greece                    | Cars                                                    | 25  | 0.01   | 13.14 | 1.24 | 0.11 * | Christia et al.,2018     |
| 13674-84-5 | TCIPP | 2008      | Belgium                   | Homes (floor)                                           | 33  | 0.19   | 73.7  | 4.82 | 1.38   | Van den Eede et al.,2011 |
|            |       | 2008      | Belgium                   | Shop                                                    | 15  | 0.58   | 24.4  | 5.16 | 2.94   | Van den Eede et al.,2011 |
|            |       | 2008      | Danmark (Odense)          | Daycare centers (shelves,ledges,windows sills)          | 151 | <1.10  | 350   | -    | 5.6    | Langer et al.,2016       |
|            |       | 2008      | Danmark (Odense)          | Homes (children bedroom's,shelves,ledges,windows sills) | 497 | <1.10  | 100   | -    | <1,10  | Langer et al.,2016       |
|            |       | 2008      | Swenden (Stockolm)        | Homes                                                   | 62  | 1.21   | 98    | -    | 11     | Luongo and Östman.,2016  |
|            |       | 2010      | Roumania (Lasi)           | Homes                                                   | 47  | <0.02  | 16.4  | 2.5  | 0.86   | Dirtu et al.,2012        |
|            |       | 2010–2011 | Germany                   | Cars                                                    | 12  | 1.4    | 4.3   | 3.1  | 3.2    | Brommer et al.,2012      |
|            |       | 2010–2011 | Germany                   | Offices                                                 | 10  | 0.18   | 9.4   | 3    | -      | Brommer et al.,2012      |
|            |       | 2011–2012 | Germany                   | Dayecare centers                                        | 63  | 0.71   | 47    | 4.65 | 2.68   | Fromme et al.,2014       |
|            |       | 2011–2012 | Germany                   | Cars                                                    | 19  | 0.29   | 100   | -    | 2.9    | Harrad et al.,2016       |
|            |       | 2011–2012 | Germany                   | Homes (living rooms)                                    | 22  | 0.33   | 5.7   | -    | 1      | Harrad et al.,2016       |
|            |       | 2011–2012 | Germany                   | Offices                                                 | 25  | 0.18   | 13    | -    | 1.6    | Harrad et al.,2016       |
|            |       | 2011–2012 | UK ( West Midlands)       | Cars                                                    | 21  | 2.4    | 370   | 83   | 53     | Brommer and Harrad.,2015 |
|            |       | 2011–2012 | UK ( West Midlands)       | Classroom                                               | 28  | 1.7    | 210   | 33   | 16     | Brommer and Harrad.,2015 |
|            |       | 2011–2012 | UK ( West Midlands)       | Homes (living room)                                     | 32  | 3.7    | 100   | 29   | 21     | Brommer and Harrad.,2015 |
|            |       | 2011–2012 | UK ( West Midlands)       | Offices                                                 | 61  | 3.6    | 230   | 44   | 33     | Brommer and Harrad.,2015 |
|            |       | 2012      | Norway                    | Homes                                                   | 48  | -      | 40.1  | 5.74 | 2.68   | Cequier et al.,2014      |
|            |       | 2013      | Czech Republic            | Homes                                                   | 30  | 0.16   | 26.7  | -    | 1.86   | Vykoukalová et al.,2017  |
|            |       | 2013–2014 | Norway (Oslo)             | Homes (surface)                                         | 61  | <0.055 | 498   | -    | 5.24   | Xu et al.,2016           |
|            |       | 2013–2014 | Norway (Oslo)             | Homes (floor)                                           | 61  | <0.055 | 145   | -    | 2      | Xu et al.,2016           |
|            |       | 2013–2015 | Netherlands               | Homes (playroom)                                        | 50  | 0.14   | 0.03  | -    | 0.83   | Sugeng et al.2018        |
|            |       | 2015      | Germany (Rhine/Main area) | Cars                                                    | 11  | 4      | 340   | 41   | 7.8    | Zhou et al.,2017         |
|            |       | 2015      | Germany (Rhine/Main area) | Homes                                                   | 15  | 1.7    | 10    | 5    | 4.2    | Zhou et al.,2017         |
|            |       | 2015      | Germany (Rhine/Main area) | Offices                                                 | 11  | 1.8    | 470   | 52   | 8.5    | Zhou et al.,2017         |

|            |        |           |                           |                                                         |     |         |       |      |         |                          |
|------------|--------|-----------|---------------------------|---------------------------------------------------------|-----|---------|-------|------|---------|--------------------------|
|            |        | -         | Greece                    | Cars                                                    | 25  | 0.11    | 101.8 | 8.06 | 2.61 *  | Christia et al.,2018     |
|            |        | -         | Sweden (Stockolm)         | Daycare center                                          | 10  | 0.8     | 12    | 4.5  | 3.1     | Bergh et al.,2011        |
|            |        | -         | Sweden (Stockolm)         | Homes                                                   | 10  | 0.7     | 11    | 3.1  | 1.6     | Bergh et al.,2011        |
|            |        | -         | Sweden (Stockolm)         | Offices                                                 | 10  | 3.4     | 120   | 32   | 19      | Bergh et al.,2011        |
| 126-72-7   | TDBPP  | 2013      | UK                        | Homes                                                   | 10  | <0.0005 | 0     | 0    | <0,0005 | Kademoglou et al.,2017   |
|            |        | 2013      | Czech Republic            | Homes                                                   | 30  | N.D     | N.D   | -    | N.D     | Vykoukalová et al.,2017  |
|            |        | 2013–2014 | Norway                    | Homes                                                   | 10  | 0       | 0.02  | 0.01 | 0       | Kademoglou et al.,2017   |
| 13674-87-8 | TDCIPP | 2008      | Belgium                   | Homes (floor)                                           | 33  | <0.08   | 6.64  | 0.57 | 0.36    | Van den Eede et al.,2011 |
|            |        | 2008      | Belgium                   | Shop                                                    | 15  | <0.08   | 56.2  | 4.61 | 0.76    | Van den Eede et al.,2011 |
|            |        | 2008      | Danmark (Odense)          | Daycare centers (shelves,ledges,windows sills)          | 151 | <1.20   | 320   | -    | 7.1     | Langer et al.,2016       |
|            |        | 2008      | Danmark (Odense)          | Homes (children bedroom's,shelves,ledges,windows sills) | 497 | <1.20   | 860   | -    | <1,20   | Langer et al.,2016       |
|            |        | 2008      | Swenden (Stockolm)        | Homes                                                   | 62  | <0.60   | 12    | -    | 2       | Luongo and Östman.,2016  |
|            |        | 2010      | Roumania (Lasi)           | Homes                                                   | 47  | <0.02   | 0.46  | 0.1  | 0.06    | Dirtu et al.,2012        |
|            |        | 2010–2011 | Germany                   | Cars                                                    | 12  | <0.08   | 620   | 130  | 21      | Brommer et al.,2012      |
|            |        | 2010–2011 | Germany                   | Offices                                                 | 10  | <0.08   | 0.29  | 0.15 | -       | Brommer et al.,2012      |
|            |        | 2010–2011 | Portugal                  | Homes                                                   | 28  | <0.0018 | 0.39  | 0.06 | 0.02    | Coelho et al.,2016       |
|            |        | 2011–2012 | Germany                   | Cars                                                    | 19  | <0.03   | 620   | -    | 4.1     | Harrad et al.,2016       |
|            |        | 2011–2012 | Germany                   | Homes (living rooms)                                    | 22  | <0.03   | 14    | -    | 0.08    | Harrad et al.,2016       |
|            |        | 2011–2012 | Germany                   | Offices                                                 | 25  | <0.03   | 2.2   | -    | 0.14    | Harrad et al.,2016       |
|            |        | 2011–2012 | UK ( West Midlands)       | Cars                                                    | 21  | 0.11    | 740   | 110  | 31      | Brommer and Harrad.,2015 |
|            |        | 2011–2012 | UK ( West Midlands)       | Classroom                                               | 28  | 0.04    | 10    | 1.1  | 0.51    | Brommer and Harrad.,2015 |
|            |        | 2011–2012 | UK ( West Midlands)       | Homes (living room)                                     | 32  | 0.06    | 14    | 2    | 0.71    | Brommer and Harrad.,2015 |
|            |        | 2011–2012 | UK ( West Midlands)       | Offices                                                 | 61  | <0.03   | 51    | 2.1  | 0.48    | Brommer and Harrad.,2015 |
|            |        | 2012      | Norway                    | Homes                                                   | 48  | -       | 6.92  | 0.8  | 0.5     | Cequier et al.,2014      |
|            |        | 2013      | Czech Republic            | Homes                                                   | 30  | 0.06    | 1.22  | -    | 0.18    | Vykoukalová et al.,2017  |
|            |        | 2013      | UK                        | Homes                                                   | 10  | 0.35    | 3.79  | 1.08 | 0.75    | Kademoglou et al.,2017   |
|            |        | 2013–2014 | Norway                    | Homes                                                   | 10  | 0.08    | 2.31  | 0.51 | 0.34    | Kademoglou et al.,2017   |
|            |        | 2013–2014 | Norway (Oslo)             | Homes (floor)                                           | 61  | <0.055  | 6     | -    | 0.4     | Xu et al.,2016           |
|            |        | 2013–2014 | Norway (Oslo)             | Homes (surface)                                         | 61  | <0.055  | 366   | -    | 1.13    | Xu et al.,2016           |
|            |        | 2013–2015 | Netherlands               | Homes (playroom)                                        | 50  | 0.03    | 0.01  | -    | 0.7     | Sugeng et al.2018        |
|            |        | 2015      | Germany (Rhine/Main area) | Cars                                                    | 11  | 3       | 56    | 16   | 4.7     | Zhou et al.,2017         |
|            |        | 2015      | Germany (Rhine/Main area) | Homes                                                   | 15  | <LOD    | 4.3   | 0.85 | <LOD    | Zhou et al.,2017         |
|            |        | 2015      | Germany (Rhine/Main area) | Offices                                                 | 11  | 0.8     | 39    | 6.3  | 3.2     | Zhou et al.,2017         |
|            |        | -         | Greece                    | Cars                                                    | 25  | 0.02    | 85.04 | 7.52 | 2.51 *  | Christia et al.,2018     |
|            |        | -         | Sweden (Stockolm)         | Daycare center                                          | 10  | 3.9     | 150   | 28   | 9.1     | Bergh et al.,2011        |
|            |        | -         | Sweden (Stockolm)         | Homes                                                   | 10  | 2.2     | 27    | 12   | 10      | Bergh et al.,2011        |
|            |        | -         | Sweden (Stockolm)         | Offices                                                 | 10  | 3.3     | 91    | 30   | 17      | Bergh et al.,2011        |
| 78-42-2    | TEHP   | 2008      | Danmark (Odense)          | Daycare centers (shelves,ledges,windows sills)          | 151 | <2.50   | 3.8   | -    | <2.50   | Langer et al.,2016       |
|            |        | 2008      | Danmark (Odense)          | Homes (children bedroom's,shelves,ledges,windows sills) | 497 | <2.50   | 11    | -    | <2.50   | Langer et al.,2016       |
|            |        | 2008      | Swenden (Stockolm)        | Homes                                                   | 62  | <2.10   | 46    | -    | <2.10   | Luongo and Östman.,2016  |
|            |        | 2010–2011 | Portugal                  | Homes                                                   | 28  | 0.25    | 2.3   | 2.2  | 1.7     | Coelho et al.,2016       |
|            |        | 2011–2012 | Germany                   | Daycare centers                                         | 63  | <0.30   | 4.85  | 0.68 | 0.5     | Fromme et al.,2014       |
|            |        | 2013      | Czech Republic            | Homes                                                   | 30  | 0.04    | 10.3  | -    | 0.15    | Vykoukalová et al.,2017  |

|            |       |           |                           |                                                         |     |        |      |       |       |                          |
|------------|-------|-----------|---------------------------|---------------------------------------------------------|-----|--------|------|-------|-------|--------------------------|
|            |       | 2013      | UK                        | Homes                                                   | 10  | 0.1    | 0.47 | 0.22  | 0.16  | Kademoglou et al.,2017   |
|            |       | 2013–2014 | Norway                    | Homes                                                   | 10  | 0.11   | 0.62 | 0.24  | 0.18  | Kademoglou et al.,2017   |
|            |       | 2013–2014 | Norway (Oslo)             | Homes (floor)                                           | 61  | <0.140 | 3.98 | -     | 0.4   | Xu et al.,2016           |
|            |       | 2013–2014 | Norway (Oslo)             | Homes (surface)                                         | 61  | <0.140 | 450  | -     | 0.71  | Xu et al.,2016           |
|            |       | 2015      | Germany (Rhine/Main area) | Cars                                                    | 11  | 0.7    | 14   | 3.1   | 2     | Zhou et al.,2017         |
|            |       | 2015      | Germany (Rhine/Main area) | Homes                                                   | 15  | <LOD   | 2.1  | 0.14  | <LOD  | Zhou et al.,2017         |
|            |       | 2015      | Germany (Rhine/Main area) | Offices                                                 | 11  | <LOD   | 1.4  | 0.43  | <LOD  | Zhou et al.,2017         |
|            |       | -         | Sweden (Stockolm)         | Daycare center                                          | 10  | N.D    | 0.7  | 0.2   | 0.1   | Bergh et al.,2011        |
|            |       | -         | Sweden (Stockolm)         | Homes                                                   | 10  | N.D    | 0.2  | N.D   | N.D   | Bergh et al.,2011        |
|            |       | -         | Sweden (Stockolm)         | Offices                                                 | 10  | N.D    | 0.3  | 0.1   | N.D   | Bergh et al.,2011        |
| 78-40-0    | TEP   | 2008      | Belgium                   | Homes (floor)                                           | 33  | N.D    | N.D  | <0.05 | <0.05 | Van den Eede et al.,2011 |
|            |       | 2008      | Belgium                   | Shop                                                    | 15  | <0.05  | 0.37 | 0.13  | 0.06  | Van den Eede et al.,2011 |
|            |       | 2008      | Swenden (Stockolm)        | Homes                                                   | 62  | <0.03  | 4.3  | -     | 0.19  | Luongo and Östman.,2016  |
|            |       | 2010      | Romania (Lasi)            | Homes                                                   | 47  | <0.01  | 0.42 | 0.03  | 0.02  | Dirtu et al.,2012        |
|            |       | 2015      | Germany (Rhine/Main area) | Cars                                                    | 11  | 0.2    | 4.2  | 0.99  | 0.44  | Zhou et al.,2017         |
|            |       | 2015      | Germany (Rhine/Main area) | Homes                                                   | 15  | <LOD   | 2.3  | 0.31  | <LOD  | Zhou et al.,2017         |
|            |       | 2015      | Germany (Rhine/Main area) | Offices                                                 | 11  | 0.25   | 4.3  | 0.82  | 0.42  | Zhou et al.,2017         |
|            |       | -         | Sweden (Stockolm)         | Daycare center                                          | 10  | N.D    | 4.7  | 0.7   | 0.2   | Bergh et al.,2011        |
|            |       | -         | Sweden (Stockolm)         | Homes                                                   | 10  | N.D    | N.D  | N.D   | N.D   | Bergh et al.,2011        |
|            |       | -         | Sweden (Stockolm)         | Offices                                                 | 10  | N.D    | 0.3  | 0.1   | 0.1   | Bergh et al.,2011        |
| 2528-39-4  | THP   | 2008      | Swenden (Stockolm)        | Homes                                                   | 62  | <0.03  | 5.8  | -     | <0.30 | Luongo and Östman.,2016  |
| 126-71-6   | TIBP  | 2008      | Belgium                   | Homes (floor)                                           | 33  | 0.7    | 15.6 | 4.2   | 2.99  | Van den Eede et al.,2011 |
|            |       | 2008      | Danmark (Odense)          | Daycare centers (shelves,ledges,windows sills)          | 151 | <0.03  | 2.5  | -     | <0.03 | Langer et al.,2016       |
|            |       | 2008      | Danmark (Odense)          | Homes (children bedroom's,shelves,ledges,windows sills) | 497 | <0.03  | 37   | -     | <0,03 | Langer et al.,2016       |
|            |       | 2008      | Swenden (Stockolm)        | Homes                                                   | 62  | <0.02  | 47   | -     | 5.3   | Luongo and Östman.,2016  |
|            |       | 2010      | Roumania (Lasi)           | Homes                                                   | 47  | <0.10  | 2.39 | 0.4   | 0.39  | Dirtu et al.,2012        |
|            |       | 2011–2012 | Germany                   | Daycare centers                                         | 63  | <0.30  | 8.3  | 0.77  | <0.30 | Fromme et al.,2014       |
|            |       | 2015      | Germany (Rhine/Main area) | Cars                                                    | 11  | 0.28   | 2.3  | 0.75  | 0.51  | Zhou et al.,2017         |
|            |       | 2015      | Germany (Rhine/Main area) | Homes                                                   | 15  | <LOD   | 0.82 | 0.37  | 0.38  | Zhou et al.,2017         |
|            |       | 2015      | Germany (Rhine/Main area) | Offices                                                 | 11  | 0.31   | 1.3  | 0.68  | 0.66  | Zhou et al.,2017         |
|            |       | -         | Sweden (Stockolm)         | Daycare center                                          | 10  | 0.5    | 1.5  | 0.9   | 0.7   | Bergh et al.,2011        |
|            |       | -         | Sweden (Stockolm)         | Homes                                                   | 10  | 0.4    | 3.6  | 1.4   | 1.1   | Bergh et al.,2011        |
|            |       | -         | Sweden (Stockolm)         | Offices                                                 | 10  | 0.5    | 9.2  | 2.4   | 1.3   | Bergh et al.,2011        |
| 513-02-0   | TIPP  | 2008      | Swenden (Stockolm)        | Homes                                                   | 62  | <0.02  | 0.4  | -     | <0.02 | Luongo and Östman.,2016  |
| 64532-95-2 | TiPPP | 2013      | Czech Republic            | Homes                                                   | 30  | 0      | 0.51 | -     | 0.01  | Vykoukalová et al.,2017  |
| 1330-78-5  | TMPP  | 2008      | Belgium                   | Homes (floor)                                           | 33  | <0.04  | 5.07 | 0.44  | 0.24  | Van den Eede et al.,2011 |
|            |       | 2008      | Belgium                   | Shop                                                    | 15  | <0.04  | 12.5 | 1.53  | 0.2   | Van den Eede et al.,2011 |
|            |       | 2008      | Danmark (Odense)          | Daycare centers (shelves,ledges,windows sills)          | 151 | <0.89  | 36   | -     | <0.89 | Langer et al.,2016       |
|            |       | 2008      | Danmark (Odense)          | Homes (children bedroom's,shelves,ledges,windows sills) | 497 | <0.89  | 18   | -     | <0.89 | Langer et al.,2016       |
|            |       | 2008      | Swenden (Stockolm)        | Homes                                                   | 62  | <0.49  | 31   | -     | 2.7   | Luongo and Östman.,2016  |
|            |       | 2010      | Roumania (Lasi)           | Homes                                                   | 47  | <0.05  | 5.5  | 1     | 0.5   | Dirtu et al.,2012        |
|            |       | 2010–2011 | Portugal                  | Homes                                                   | 28  | 0.02   | 0.48 | 0.13  | 0.1   | Coelho et al.,2016       |
|            |       | 2011–2012 | Germany                   | Cars                                                    | 12  | <0.04  | 150  | 24    | 1.2   | Brommer et al.,2012      |

|          |      |           |                           |                                                         |     |          |      |      |        |                          |
|----------|------|-----------|---------------------------|---------------------------------------------------------|-----|----------|------|------|--------|--------------------------|
|          |      | 2011–2012 | Germany                   | Offices                                                 | 10  | <0.04    | 1.9  | 0.37 | -      | Brommer et al.,2012      |
|          |      | 2011–2012 | Germany                   | Cars                                                    | 19  | <0.01    | 150  | -    | 0.86   | Harrad et al.,2016       |
|          |      | 2011–2012 | Germany                   | Homes (living rooms)                                    | 22  | <0.01    | 1.3  | -    | 0.14   | Harrad et al.,2016       |
|          |      | 2011–2012 | Germany                   | Offices                                                 | 25  | <0.01    | 1.9  | -    | 1.9    | Harrad et al.,2016       |
|          |      | 2011–2012 | UK ( West Midlands)       | Cars                                                    | 21  | <0.01    | 5.6  | 1    | 0.59   | Brommer and Harrad.,2015 |
|          |      | 2011–2012 | UK ( West Midlands)       | Classroom                                               | 28  | <0.01    | 5.8  | 0.05 | <0.01  | Brommer and Harrad.,2015 |
|          |      | 2011–2012 | UK ( West Midlands)       | Homes (living room)                                     | 32  | <0.01    | 14   | 2    | 0.02   | Brommer and Harrad.,2015 |
|          |      | 2011–2012 | UK ( West Midlands)       | Offices                                                 | 61  | <0.01    | 5.3  | 0.33 | <0.01  | Brommer and Harrad.,2015 |
|          |      | 2012      | Norway                    | Homes                                                   | 48  | -        | 16.2 | 1.12 | 0.31   | Cequier et al.,2014      |
|          |      | 2013      | UK                        | Homes                                                   | 10  | 0.08     | 1.05 | 0.46 | 0.29   | Kademoglou et al.,2017   |
|          |      | 2013–2014 | Norway                    | Homes                                                   | 10  | 0.11     | 3.18 | 0.5  | 0.19   | Kademoglou et al.,2017   |
|          |      | 2013–2014 | Norway (Oslo)             | Homes (dust)                                            | 61  | <0.020   | 30.1 | -    | 0.33   | Xu et al.,2016           |
|          |      | 2013–2014 | Norway (Oslo)             | Homes (floor)                                           | 61  | <0.020   | 7.52 | -    | 0.18   | Xu et al.,2016           |
|          |      | 2013–2015 | Netherlands               | Homes (playroom)                                        | 50  | 0        | 3.99 | -    | 0.21   | Sugeng et al.2018        |
|          |      | 2015      | Germany (Rhine/Main area) | Cars                                                    | 11  | <LOD     | 120  | 14   | 2.3    | Zhou et al.,2017         |
|          |      | 2015      | Germany (Rhine/Main area) | Homes                                                   | 15  | <LOD     | 3.3  | 0.43 | <LOD   | Zhou et al.,2017         |
|          |      | 2015      | Germany (Rhine/Main area) | Offices                                                 | 11  | <LOD     | 48   | 8.2  | 0.34   | Zhou et al.,2017         |
|          |      | -         | Greece                    | Cars                                                    | 25  | 0.02     | 0.88 | 0.15 | 0.03 * | Christia et al.,2018     |
|          |      | -         | Sweden (Stockolm)         | Daycare center                                          | 10  | N.D      | 13   | 2    | 0.4    | Bergh et al.,2011        |
|          |      | -         | Sweden (Stockolm)         | Homes                                                   | 10  | N.D      | 3    | 1.2  | 1      | Bergh et al.,2011        |
|          |      | -         | Sweden (Stockolm)         | Offices                                                 | 10  | N.D      | 2.9  | 0.8  | 0.6    | Bergh et al.,2011        |
| 126-73-8 | TNBP | 2008      | Belgium                   | Homes (floor)                                           | 33  | 0.03     | 2.7  | 0.25 | 0.13   | Van den Eede et al.,2011 |
|          |      | 2008      | Belgium                   | Shop                                                    | 15  | 0.05     | 6.01 | 0.63 | 0.21   | Van den Eede et al.,2011 |
|          |      | 2008      | Danmark (Odense)          | Daycare centers (shelves,ledges,windows sills)          | 151 | <0.11    | 4.3  | -    | <0,11  | Langer et al.,2016       |
|          |      | 2008      | Danmark (Odense)          | Homes (children bedroom's,shelves,ledges,windows sills) | 497 | <0.11    | 4    | -    | <0,11  | Langer et al.,2016       |
|          |      | 2008      | Swenden (Stockolm)        | Homes                                                   | 62  | 0.12     | 162  | -    | 5.6    | Luongo and Östman.,2016  |
|          |      | 2010      | Roumania (Lasi)           | Homes                                                   | 47  | <0.02    | 0.38 | 0.07 | 0.05   | Dirtu et al.,2012        |
|          |      | 2011–2012 | Germany                   | Cars                                                    | 12  | <0.03    | 0.63 | 0.11 | 0.02   | Brommer et al.,2012      |
|          |      | 2011–2012 | Germany                   | Offices                                                 | 10  | <0.03    | 0.41 | 0.22 | -      | Brommer et al.,2012      |
|          |      | 2011–2012 | Portugal                  | Homes                                                   | 28  | <0.00044 | 0.55 | 0.07 | 0.03   | Coelho et al.,2016       |
|          |      | 2011–2012 | Germany                   | Daycare centers                                         | 63  | <0.30    | 3.7  | 0.29 | <0.30  | Fromme et al.,2014       |
|          |      | 2011–2012 | Germany                   | Cars                                                    | 19  | <0.03    | 0.63 | -    | <0.03  | Harrad et al.,2016       |
|          |      | 2011–2012 | Germany                   | Homes (living rooms)                                    | 22  | <0.03    | 0.25 | -    | <0.03  | Harrad et al.,2016       |
|          |      | 2011–2012 | Germany                   | Offices                                                 | 25  | <0.03    | 0.76 | -    | 0.17   | Harrad et al.,2016       |
|          |      | 2011–2012 | UK ( West Midlands)       | Cars                                                    | 21  | <0.03    | 1.2  | 0.14 | <0.03  | Brommer and Harrad.,2015 |
|          |      | 2011–2012 | UK ( West Midlands)       | Classroom                                               | 28  | <0.03    | 0.46 | 0.17 | 0.12   | Brommer and Harrad.,2015 |
|          |      | 2011–2012 | UK ( West Midlands)       | Homes (living room)                                     | 32  | <0.03    | 0.09 | 0.04 | <0.03  | Brommer and Harrad.,2015 |
|          |      | 2011–2012 | UK ( West Midlands)       | Offices                                                 | 61  | <0.03    | 1.3  | 0.1  | <0.03  | Brommer and Harrad.,2015 |
|          |      | 2012      | Norway                    | Homes                                                   | 48  | -        | 0.98 | 0.12 | 0.06   | Cequier et al.,2014      |
|          |      | 2013      | Czech Republic            | Homes                                                   | 30  | 0.01     | 0.16 | -    | 0.05   | Vykoukalová et al.,2017  |
|          |      | 2013      | UK                        | Homes                                                   | 10  | 0.21     | 0.48 | 0.31 | 0.26   | Kademoglou et al.,2017   |
|          |      | 2013–2014 | Norway                    | Homes                                                   | 10  | 0.23     | 3.12 | 0.71 | 0.49   | Kademoglou et al.,2017   |
|          |      | 2013–2014 | Norway (Oslo)             | Homes (floor)                                           | 61  | <0.190   | 2.95 | -    | <0.190 | Xu et al.,2016           |

|           |      |           |                           |                                                         |     |          |        |        |        |                           |
|-----------|------|-----------|---------------------------|---------------------------------------------------------|-----|----------|--------|--------|--------|---------------------------|
|           |      | 2013–2014 | Norway (Oslo)             | Homes (surface)                                         | 61  | <0.190   | 3.03   | -      | <0.190 | Xu et al.,2016            |
|           |      | 2015      | Germany (Rhine/Main area) | Cars                                                    | 11  | 0.21     | 1.3    | 0.62   | 0.41   | Zhou et al.,2017          |
|           |      | 2015      | Germany (Rhine/Main area) | Homes                                                   | 15  | <LOD     | 1.4    | 0.32   | 1.4    | Zhou et al.,2017          |
|           |      | 2015      | Germany (Rhine/Main area) | Offices                                                 | 11  | <LOD     | 1.2    | 0.38   | 0.28   | Zhou et al.,2017          |
|           |      | -         | Sweden (Stockolm)         | Daycare center                                          | 10  | 0.1      | 6.2    | 2      | 1.2    | Bergh et al.,2011         |
|           |      | -         | Sweden (Stockolm)         | Homes                                                   | 10  | N.D      | 1.7    | 0.6    | 0.3    | Bergh et al.,2011         |
|           |      | -         | Sweden (Stockolm)         | Offices                                                 | 10  | N.D      | 3.2    | 0.7    | 0.2    | Bergh et al.,2011         |
| 78-30-8   | ToCP | 2013      | Czech Republic            | Homes                                                   | 30  | N.D      | 0.25   | -      | 0      | Vykoukalová et al.,2017   |
| 78-32-0   | TpCP | 2013      | Czech Republic            | Homes                                                   | 30  | 0        | 2.5    | -      | 0.2    | Vykoukalová et al.,2017   |
| 2528-38-3 | TPEP | 2010–2011 | Portugal                  | Homes                                                   | 28  | <0.00028 | 0.03   | 0      | 0      | Coelho et al.,2016        |
|           |      | 2013      | UK                        | Homes                                                   | 10  | 18.33    | 1010   | 152.69 | 64.55  | Kademoglou et al.,2017    |
|           |      | 2013–2014 | Norway                    | Homes                                                   | 10  | 1        | 33.89  | 5.83   | 1.96   | Kademoglou et al.,2017    |
| 115-86-6  | TPHP | 2008      | Belgium                   | Homes (floor)                                           | 33  | 0.04     | 29.8   | 2.02   | 0.5    | Van den Eede et al.,2011  |
|           |      | 2008      | Belgium                   | Shop                                                    | 15  | 0.15     | 34.2   | 4.7    | 1.97   | Van den Eede et al.,2011  |
|           |      | 2008      | Danmark (Odense)          | Daycare centers (shelves,ledges,windows sills)          | 151 | <0.94    | 210    | -      | 2      | Langer et al.,2016        |
|           |      | 2008      | Danmark (Odense)          | Homes (children bedroom's,shelves,ledges,windows sills) | 497 | <0.94    | 91     | -      | <0.94  | Langer et al.,2016        |
|           |      | 2008      | Swenden (Stockolm)        | Homes                                                   | 62  | 0.68     | 38     | -      | 4.3    | Luongo and Östman.,2016   |
|           |      | 2010      | Roumania (Lasi)           | Homes                                                   | 47  | <0.02    | 22.6   | 1.6    | 0.5    | Dirtu et al.,2012         |
|           |      | 2010      | Roumania (Lasi)           | Homes                                                   | 47  | <0.01    | 0.04   | <0.01  | <0.01  | Dirtu et al.,2012         |
|           |      | 2010–2011 | Germany                   |                                                         | 10  | 0.47     | 4.8    | 2.5    | -      | Brommer et al.,2012       |
|           |      | 2010–2011 | Germany                   | Cars                                                    | 12  | 0.5      | 11     | 3      | 2.3    | Brommer et al.,2012       |
|           |      | 2010–2011 | Portugal                  | Homes                                                   | 28  | 0.11     | 5.2    | 1      | 0.66   | Coelho et al.,2016        |
|           |      | 2011–2012 | Germany                   | Daycare centers                                         | 63  | <0.30    | 64.5   | 2.56   | 0.5    | Fromme et al.,2014        |
|           |      | 2011–2012 | Germany                   | Cars                                                    | 19  | 0.33     | 11     | -      | 1.8    | Harrad et al.,2016        |
|           |      | 2011–2012 | Germany                   | Homes (living rooms)                                    | 22  | 0.07     | 18     | -      | 0.23   | Harrad et al.,2016        |
|           |      | 2011–2012 | Germany                   | Offices                                                 | 25  | 0.2      | 8.8    | -      | 1.5    | Harrad et al.,2016        |
|           |      | 2011–2012 | UK ( West Midlands)       | Cars                                                    | 21  | 0.27     | 170    | 15     | 3.3    | Brommer and Harrad.,2015  |
|           |      | 2011–2012 | UK ( West Midlands)       | Classroom                                               | 28  | 0.22     | 90     | 12     | 4.1    | Brommer and Harrad.,2015  |
|           |      | 2011–2012 | UK ( West Midlands)       | Homes (living room)                                     | 32  | 0.49     | 110    | 10     | 3.3    | Brommer and Harrad.,2015  |
|           |      | 2011–2012 | UK ( West Midlands)       | Offices                                                 | 61  | 0.56     | 50     | 8.2    | 4.3    | Brommer and Harrad.,2015  |
|           |      | 2012      | Norway                    | Homes                                                   | 48  | 1.21     | 4.85   | 1.24   | 0.98   | Cequier et al.,2014       |
|           |      | 2013      | UK                        | Homes                                                   | 10  | 0.19     | 9.55   | 2.74   | 1.51   | Kademoglou et al.,2017    |
|           |      | 2013–2014 | Norway                    | Homes                                                   | 10  | 0.2      | 2.92   | 0.93   | 0.83   | Kademoglou et al.,2017    |
|           |      | 2013–2014 | Norway (Oslo)             | Homes (floor)                                           | 61  | 0.16     | 276    | -      | 0.72   | Xu et al.,2016            |
|           |      | 2013–2014 | Norway (Oslo)             | Homes (surface)                                         | 61  | 0.33     | 956    | -      | 1.23   | Xu et al.,2016            |
|           |      | 2013–2015 | Netherlands               | Homes (playroom)                                        | 50  | 0.19     | 9.86   | -      | 0.55   | Sugeng et al.2018         |
|           |      | 2015      | Germany (Rhine/Main area) | Cars                                                    | 11  | 0.72     | 74     | 9.2    | 2.2    | Zhou et al.,2017          |
|           |      | 2015      | Germany (Rhine/Main area) | Homes                                                   | 15  | 0.48     | 23     | 3.6    | 1.2    | Zhou et al.,2017          |
|           |      | 2015      | Germany (Rhine/Main area) | Offices                                                 | 11  | 0.77     | 9.2    | 3.3    | 2.9    | Zhou et al.,2017          |
|           |      | 2016      | The netherlands           | Homes (on top of electronics)                           | 11  | 0.29     | 45.33  | 10.35  | 9.79   | Björnsdotter et al., 2018 |
|           |      | 2016      | The netherlands           | Homes and Offices                                       | 12  | 0.17     | 12.85  | 3.07   | 1.44   | Björnsdotter et al., 2018 |
|           |      | 2017      | Spain                     | Cars                                                    | 15  | 0.76     | 142.46 | 18.31  | 4.44   | Björnsdotter et al., 2018 |
|           |      | 2017      | Spain                     | Homes (on top of electronics)                           | 13  | 1.27     | 2.62   | 59     | 2.42   | Björnsdotter et al., 2018 |



|            |     |           |                    |                |    |         |       |       |        |                         |
|------------|-----|-----------|--------------------|----------------|----|---------|-------|-------|--------|-------------------------|
|            |     | -         | Greece             | Cars           | 25 | 0.02    | 5.12  | 0.86  | 0.30 * | Christia et al.,2018    |
|            |     | -         | Sweden (Stockolm)  | Daycare center | 10 | 0.3     | 17    | 3.5   | 1.9    | Bergh et al.,2011       |
|            |     | -         | Sweden (Stockolm)  | Homes          | 10 | 0.1     | 4.2   | 1.6   | 1.2    | Bergh et al.,2011       |
|            |     | -         | Sweden (Stockolm)  | Offices        | 10 | 0.9     | 32    | 8.8   | 5.3    | Bergh et al.,2011       |
| 513-08-6   | TPP | 2008      | Swenden (Stockolm) | Homes          | 62 | <0.01   | 1.6   | -     | <0.01  | Luongo and Östman.,2016 |
|            |     | 2010–2011 | Portugal           | Homes          | 28 | <0.86   | 10    | 3     | 2.4    | Coelho et al.,2016      |
|            |     | 2013      | UK                 | Homes          | 10 | <0.03   | <0.03 | <0.03 | <0.03  | Kademoglou et al.,2017  |
|            |     | 2013–2014 | Norway             | Homes          | 10 | <0.03   | <0.03 | <0.03 | <0.03  | Kademoglou et al.,2017  |
| 25653-16-1 | TXP | 2013      | UK                 | Homes          | 10 | <0.0011 | 0.54  | 0.08  | 0.03   | Kademoglou et al.,2017  |
|            |     | 2013      | Czech Republic     | Homes          | 30 | N.D     | N.D   | -     | N.D    | Vykoukalová et al.,2017 |
|            |     | 2013–2014 | Norway             | Homes          | 10 | 0       | 0.11  | 0.03  | 0.01   | Kademoglou et al.,2017  |

-: information not available; N.D.: not detected; \*: median calculated with detected measures LOD : limit of detection.

**Supplementary Table S3.** Concentrations of OPFRs in indoor air (ng/m<sup>3</sup>), Europe, 2000-2018.

| CAS Number | Abbreviation | Period    | Country                   | Sampling Location | Sample Size | Min   | Max   | Mean  | Median | References              |
|------------|--------------|-----------|---------------------------|-------------------|-------------|-------|-------|-------|--------|-------------------------|
| 1241-94-7  | EHDPP        | 2006–2007 | Sweden (Stockolm)         | Homes             | 169         | N.D   | 24    | 5.6   | <5.5   | Bergh C et al.,2011     |
|            |              | 2008      | Sweden (Stockolm)         | Homes             | 62          | N.D   | 3.9   | -     | N.D    | Luongo and Östman.,2016 |
|            |              | 2012      | Norway                    | Homes             | 47          | -     | 3.51  | 0.489 | 0.119  | Cequier et al.,2014     |
|            |              | 2013      | Czech Republic            | Homes             | 29          | 0.193 | 1.09  | -     | 0.375  | Vykoukalová et al.,2017 |
|            |              | -         | Sweden (Stockolm)         | Homes             | 10          | N.D   | DET   | N.D   | N.D    | Bergh et al.,2011       |
|            |              | -         | Sweden (Stockolm)         | Day care center   | 10          | N.D   | 2.2   | 0.4   | N.D    | Bergh et al.,2011       |
|            |              | -         | Sweden (Stockolm)         | Office            | 10          | N.D   | 14    | 1.8   | N.D    | Bergh et al.,2011       |
|            |              | 2013–2014 | Norway (Oslo)             | Homes             | 61          | <0.6  | 8     | -     | <0.6   | Xu et al., 2016         |
|            |              | 2014–2015 | Sweden (Stockolm)         | Office            | 23          | <0.04 | 12    | 3.8   | 3.6    | Wong et al., 2018       |
| 78-51-3    | TBOEP        | 2006–2007 | Sweden (Stockolm)         | Homes             | 169         | N.D   | 86    | <31   | <31    | Bergh C et al.,2011     |
|            |              | 2008      | Sweden (Stockolm)         | Homes             | 62          | N.D   | 10    | -     | N.D    | Luongo and Östman.,2016 |
|            |              | 2012      | Norway                    | Homes             | 47          | -     | 18.2  | 1.45  | 0.598  | Cequier et al.,2014     |
|            |              | 2015      | Germany (Rhine/Main area) | Offices           | 11          | <0.68 | 5.33  | 0.79  | <0.68  | Zhou et al.,2017        |
|            |              | 2015      | Germany (Rhine/Main area) | School            | 12          | <0.68 | 17.51 | 1.77  | <0.68  | Zhou et al.,2017        |
| 78-33-1    | TBPP         | 2013      | Czech Republic            | Homes             | 29          | N.D   | 0.001 | -     | 0.001  | Vykoukalová et al.,2017 |
| 115-96-8   | TCEP         | 2006–2007 | Sweden (Stockolm)         | Homes             | 169         | N.D   | 230   | 10    | 4      | Bergh C et al.,2011     |
|            |              | 2008      | Sweden (Stockolm)         | Homes             | 62          | N.D   | 223   | -     | 3.9    | Luongo and Östman.,2016 |
|            |              | 2012      | Norway                    | Homes             | 47          | -     | 10.1  | 3.23  | 2.25   | Cequier et al.,2014     |
|            |              | 2013      | Czech Republic            | Homes             | 29          | 0.781 | 36.4  | -     | 2.96   | Vykoukalová et al.,2017 |
|            |              | 2015      | Germany (Rhine/Main area) | Offices           | 11          | <0.75 | 5.69  | 1.01  | 0.56   | Zhou et al.,2017        |
|            |              | 2015      | Germany (Rhine/Main area) | Schools           | 12          | <0.75 | 4.65  | 0.52  | <0.75  | Zhou et al.,2017        |
|            |              | -         | Sweden (Stockolm)         | Homes             | 10          | N.D   | 28    | 8.3   | 4.8    | Bergh et al.,2011       |
|            |              | -         | Sweden (Stockolm)         | Day care center   | 10          | 7.8   | 230   | 47    | 25     | Bergh et al.,2011       |
|            |              | -         | Sweden (Stockolm)         | Office            | 10          | N.D   | 140   | 21    | 10     | Bergh et al.,2011       |
|            |              | 2011–2012 | Germany                   | Daycare centers   | 63          | <2    | 33    | 2.2   | <2     | Fromme et al.,2014      |
|            |              | 2013–2014 | Norway (Oslo)             | Homes             | 61          | <0.9  | 76    | -     | 3      | Xu et al.,2016          |
|            |              | 2014–2015 | Sweden (Stockolm)         | Office            | 23          | 6.7   | 20    | 11    | 10.9   | Wong et al., 2018       |

|            |        |           |                           |                 |     |       |       |       |       |                         |
|------------|--------|-----------|---------------------------|-----------------|-----|-------|-------|-------|-------|-------------------------|
|            |        | 2015–2017 | Sweden                    | Preschool       | 12  | <2.2  | <2.2  | <2.2  | <2.2  | Persson et al.2018      |
|            |        | 2015–2017 | Sweden                    | Preschool       | 16  | <2.2  | <2.2  | <2.2  | <2.2  | Persson et al.2018      |
|            |        | 2015–2017 | Sweden                    | Preschool       | 12  | <2.2  | <2.2  | <2.2  | <2.2  | Persson et al.2018      |
|            |        | 2015–2017 | Sweden                    | Preschool       | 16  | <2.2  | <2.2  | <2.2  | <2.2  | Persson et al.2018      |
| 13674-84-5 | TCIPP  | 2006–2007 | Sweden (Stockolm)         | Homes           | 169 | <0.5  | 1200  | 59    | 14    | Bergh C et al.,2011     |
|            |        | 2008      | Sweden (Stockolm)         | Homes           | 62  | 1.3   | 1179  | -     | 19    | Luongo and Östman.,2016 |
|            |        | 2012      | Norway                    | Homes           | 47  | -     | 462   | 83.1  | 42.3  | Cequier et al.,2014     |
|            |        | 2013      | Czech Republic            | Homes           | 29  | 3.62  | 139   | -     | 16.4  | Vykoukalová et al.,2017 |
|            |        | 2015      | Germany (Rhine/Main area) | Offices         | 11  | 4.17  | 496.9 | 80.28 | 33.89 | Zhou et al.,2017        |
|            |        | 2015      | Germany (Rhine/Main area) | Schools         | 12  | 4.14  | 68.83 | 17.53 | 9.99  | Zhou et al.,2017        |
|            |        | -         | Sweden (Stockolm)         | Homes           | 10  | 2.4   | 64    | 15    | 5.6   | Bergh et al.,2011       |
|            |        | -         | Sweden (Stockolm)         | Day care center | 10  | 1.3   | 72    | 19    | 8.4   | Bergh et al.,2011       |
|            |        | -         | Sweden (Stockolm)         | Office          | 10  | 16    | 240   | 110   | 100   | Bergh et al.,2011       |
|            |        | 2011–2012 | Germany                   | Daycare centers | 63  | <2    | 45    | 4.1   | 2.7   | Fromme et al.,2014      |
|            |        | 2013–2014 | Norway (Oslo)             | Homes           | 61  | <1.2  | 987   | -     | 128   | Xu et al., 2017         |
|            |        | 2014–2015 | Sweden (Stockolm)         | Office          | 23  | 85    | 1900  | 480   | 330   | Wong et al., 2018       |
|            |        | 2015–2017 | Sweden                    | Preschool       | 12  | <14   | 34    | <14   | <14   | Persson et al.2018      |
|            |        | 2015–2017 | Sweden                    | Preschool       | 16  | <14   | 51    | <14   | <14   | Persson et al.2018      |
|            |        | 2015–2017 | Sweden                    | Preschool       | 12  | <14   | 93    | 21    | <14   | Persson et al.2018      |
|            |        | 2015–2017 | Sweden                    | Preschool       | 16  | <14   | <14   | <14   | <14   | Persson et al.2018      |
| 13674-87-8 | TDCIPP | 2012      | Norway                    | Homes           | 47  | -     | 10.6  | 0.394 | 0.084 | Cequier et al.,2014     |
|            |        | 2013      | Czech Republic            | Homes           | 29  | 0.228 | 0.572 | -     | 0.311 | Vykoukalová et al.,2017 |
|            |        | 2015      | Germany (Rhine/Main area) | Offices         | 11  | <0.10 | 2.89  | 0.57  | 0.42  | Zhou et al.,2017        |
|            |        | 2015      | Germany (Rhine/Main area) | Schools         | 12  | <0.10 | 29.86 | 2.99  | <0.10 | Zhou et al.,2017        |
|            |        | -         | Sweden (Stockolm)         | Homes           | 10  | N.D   | 17    | 3.1   | N.D   | Bergh et al.,2011       |
|            |        | -         | Sweden (Stockolm)         | Day care center | 10  | N.D   | 30    | 6.7   | N.D   | Bergh et al.,2011       |
|            |        | -         | Sweden (Stockolm)         | Office          | 10  | N.D   | 73    | 24    | 28    | Bergh et al.,2011       |
|            |        | 2014–2015 | Sweden (Stockolm)         | Office          | 23  | N.D   | -     | N.D   | -     | Wong et al., 2018       |
|            |        | 2015–2017 | Sweden                    | Preschool       | 12  | <11   | <11   | <11   | <11   | Persson et al.2018      |
|            |        | 2015–2017 | Sweden                    | Preschool       | 16  | <11   | <11   | <11   | <11   | Persson et al.2018      |
|            |        | 2015–2017 | Sweden                    | Preschool       | 12  | <11   | <11   | <11   | <11   | Persson et al.2018      |
|            |        | 2015–2017 | Sweden                    | Preschool       | 16  | <11   | <11   | <11   | <11   | Persson et al.2018      |
| 78-42-2    | TEHP   | 2013      | Czech Republic            | Homes           | 29  | 0.02  | 0.163 | -     | 0.037 | Vykoukalová et al.,2017 |
|            |        | 2015      | Germany (Rhine/Main area) | Offices         | 11  | <0.06 | 0.87  | 0.16  | <0.06 | Zhou et al.,2017        |
|            |        | 2015      | Germany (Rhine/Main area) | School          | 12  | <0.06 | 17.51 | 1.77  | <0.06 | Zhou et al.,2017        |
|            |        | -         | Sweden (Stockolm)         | Homes           | 10  | N.D   | N.D   | N.D   | N.D   | Bergh et al.,2011       |
|            |        | -         | Sweden (Stockolm)         | Day care center | 10  | N.D   | N.D   | N.D   | N.D   | Bergh et al.,2011       |
|            |        | -         | Sweden (Stockolm)         | Office          | 10  | N.D   | N.D   | N.D   | N.D   | Bergh et al.,2011       |
|            |        | 2013–2014 | Norway (Oslo)             | Homes           | 61  | <4.6  | 42    | -     | <4.6  | Xu et al., 2016         |
|            |        | 2014–2015 | Sweden (Stockolm)         | Office          | 23  | 0.08  | 0.64  | 0.24  | 0.19  | Wong et al., 2018       |
| 78-40-0    | TEP    | 2006–2007 | Sweden (Stockolm)         | Homes           | 169 | <0.18 | 300   | 14    | 4     | Bergh C. et al.,2011    |
|            |        | 2008      | Sweden (Stockolm)         | Homes           | 62  | 0.84  | 297   | -     | 5.3   | Luongo and Östman.,2016 |
|            |        | 2015      | Germany (Rhine/Main area) | Offices         | 11  | <0.32 | 18.34 | 1.85  | <0.32 | Zhou et al.,2017        |

|            |       |           |                           |                 |     |       |       |       |       |                         |
|------------|-------|-----------|---------------------------|-----------------|-----|-------|-------|-------|-------|-------------------------|
|            |       | 2015      | Germany (Rhine/Main area) | School          | 12  | <0.32 | 27.13 | 2.5   | <0.32 | Zhou et al.,2017        |
|            |       | 2015–2017 | Sweden                    | Preschool       | 12  | <17   | <17   | <17   | <17   | Persson et al.2018      |
|            |       | 2015–2017 | Sweden                    | Preschool       | 16  | <17   | <17   | <17   | <17   | Persson et al.2018      |
|            |       | 2015–2017 | Sweden                    | Preschool       | 12  | <17   | <17   | <17   | <17   | Persson et al.2018      |
|            |       | 2015–2017 | Sweden                    | Preschool       | 16  | <17   | 25    | <17   | <17   | Persson et al.2018      |
| 126-71-6   | TIBP  | 2006–2007 | Sweden (Stockolm)         | Homes           | 169 | 2     | 54    | 11    | 9     | Bergh C. et al.,2011    |
|            |       | 2008      | Sweden (Stockolm)         | Homes           | 62  | 2.4   | 53    | -     | 8.9   | Luongo and Östman.,2016 |
|            |       | 2015      | Germany (Rhine/Main area) | Offices         | 11  | 0.77  | 22.37 | 6.65  | 5.65  | Zhou et al.,2017        |
|            |       | 2015      | Germany (Rhine/Main area) | School          | 12  | 1.59  | 36.78 | 12.76 | 8.56  | Zhou et al.,2017        |
|            |       | -         | Sweden (Stockolm)         | Homes           | 10  | 3     | 66    | 18    | 13    | Bergh et al.,2011       |
|            |       | -         | Sweden (Stockolm)         | Day care center | 10  | N.D   | 63    | 12    | 7.2   | Bergh et al.,2011       |
|            |       | -         | Sweden (Stockolm)         | Office          | 10  | 4.4   | 13    | 7.8   | 7.3   | Bergh et al.,2011       |
| 64532-95-2 | TiPPP | 2013      | Czech Republic            | Homes           | 29  | 0.003 | 0.023 | -     | 0.005 | Vykoukalová et al.,2017 |
|            |       | 2013–2014 | Norway (Oslo)             | Homes           | 61  | <1.5  | <1.5  | -     | <1.5  | Xu et al., 2016         |
| 1330-78-5  | TMPP  | 2012      | Norway                    | Homes           | 47  | <MLD  | 0.644 | 0.08  | <MLD  | Cequier et al.,2014     |
| 126-73-8   | TNBP  | 2006-2007 | Sweden (Stockolm)         | Homes           | 169 | 2.5   | 370   | 20    | 11    | Bergh C et al.,2011     |
|            |       | 2008      | Sweden (Stockolm)         | Homes           | 62  | 2.5   | 94    | -     | 13    | Luongo and Östman.,2016 |
|            |       | 2012      | Norway                    | Homes           | 47  | -     | 124   | 9.66  | 5.09  | Cequier et al.,2014     |
|            |       | 2013      | Czech Republic            | Homes           | 29  | 0.745 | 33.1  | -     | 2.34  | Vykoukalová et al.,2017 |
|            |       | 2015      | Germany (Rhine/Main area) | Offices         | 11  | 0.29  | 112.1 | 18.5  | 5.85  | Zhou et al.,2017        |
|            |       | 2015      | Germany (Rhine/Main area) | School          | 12  | <0.05 | 25.34 | 4.25  | 2.78  | Zhou et al.,2017        |
|            |       | -         | Sweden (Stockolm)         | Homes           | 10  | 3.5   | 45    | 16    | 9.1   | Bergh et al.,2011       |
|            |       | -         | Sweden (Stockolm)         | Day care center | 10  | 3.7   | 320   | 61    | 18    | Bergh et al.,2011       |
|            |       | -         | Sweden (Stockolm)         | Office          | 10  | N.D   | 100   | 21    | 2.3   | Bergh et al.,2011       |
|            |       | 2011–2012 | Germany                   | Daycare centers | 63  | <2    | 1279  | 154   | 49    | Fromme et al.,2014      |
|            |       | 2011–2012 | Germany                   | Daycare centers | 63  | <2    | 80    | 4     | 2.2   | Fromme et al.,2014      |
|            |       | 2013–2014 | Norway (Oslo)             | Homes           | 61  | <2.7  | 119   | -     | 14    | Xu et al.,2016          |
|            |       | 2014–2015 | Sweden (Stockolm)         | Office          | 23  | 0.92  | 2.1   | 1.2   | 1.2   | Wong et al., 2018       |
|            |       | 2014–2015 | Sweden (Stockolm)         | Office          | 23  | 0.9   | 4.3   | 1.8   | 1.3   | Wong et al., 2018       |
|            |       | 2015–2017 | Sweden                    | Preschool       | 12  | <19   | <19   | <19   | <19   | Persson et al.2018      |
|            |       | 2015–2017 | Sweden                    | Preschool       | 16  | <19   | 82    | <19   | <19   | Persson et al.2018      |
|            |       | 2015–2017 | Sweden                    | Preschool       | 12  | <19   | 21    | <19   | <19   | Persson et al.2018      |
|            |       | 2015–2017 | Sweden                    | Preschool       | 16  | <19   | 150   | 36    | <19   | Persson et al.2018      |
| 115-86-6   | TPHP  | 2006–2007 | Sweden (Stockolm)         | Homes           | 169 | N.D   | 25    | 3.6   | <3.1  | Bergh C et al.,2011     |
|            |       | 2008      | Sweden                    | Homes           | 62  | N.D   | 25    | -     | N.D   | Luongo and Östman.,2016 |
|            |       | 2012      | Norway                    | Homes           | 47  | -     | 1.65  | 0.375 | 0.258 | Cequier et al.,2014     |
|            |       | 2013      | Czech Republic            | Homes           | 29  | 0.304 | 0.91  | -     | 0.592 | Vykoukalová et al.,2017 |
|            |       | -         | Sweden (Stockolm)         | Day care center | 10  | N.D   | 0.9   | 0.1   | N.D   | Bergh et al.,2011       |
|            |       | -         | Sweden (Stockolm)         | Homes           | 10  | N.D   | 0.8   | 0.2   | N.D   | Bergh et al.,2011       |
|            |       | -         | Sweden (Stockolm)         | Office          | 10  | N.D   | 2.7   | 0.6   | N.D   | Bergh et al.,2011       |
|            |       | 2013–2014 | Norway (Oslo)             | Homes           | 61  | <0.3  | 9     | -     | 1     | Xu et al., 2016         |
|            |       | 2014–2015 | Sweden (Stockolm)         | Office          | 23  | 0.16  | 0.67  | 0.31  | 0.29  | Wong et al., 2018       |
|            |       | 2015–2017 | Sweden                    | Preschool       | 12  | <2.6  | 6.7   | <2.6  | <2.6  | Persson et al.2018      |

|            |     |           |                          |           |    |       |      |       |       |                         |
|------------|-----|-----------|--------------------------|-----------|----|-------|------|-------|-------|-------------------------|
| 513-08-6   | TPP | 2015–2017 | Sweden                   | Preschool | 16 | <2.6  | 56   | 6.5   | 2.6   | Persson et al.2018      |
|            |     | 2015–2017 | Sweden                   | Preschool | 12 | <2.6  | 4.8  | <2.6  | <2.6  | Persson et al.2018      |
|            |     | 2015–2017 | Sweden                   | Preschool | 16 | <2.6  | 33   | 8.2   | 3.5   | Persson et al.2018      |
|            |     | 2015      | Germany(Rhine/Main area) | Offices   | 11 | <0.16 | 0.64 | 0.16  | <0.16 | Zhou et al.,2017        |
|            |     | 2015      | Germany(Rhine/Main area) | School    | 12 | -     | -    | <0.16 | <0.16 | Zhou et al.,2017        |
|            |     | 2015–2017 | Sweden                   | Preschool | 12 | <22   | <22  | <22   | <22   | Persson et al.2018      |
|            |     | 2015–2017 | Sweden                   | Preschool | 16 | <22   | 30   | <22   | <22   | Persson et al.2018      |
|            |     | 2015–2017 | Sweden                   | Preschool | 12 | <22   | <22  | <22   | <22   | Persson et al.2018      |
|            |     | 2015–2017 | Sweden                   | Preschool | 16 | <22   | 23   | <22   | <22   | Persson et al.2018      |
| 25653-16-1 | TXP | 2013      | Czech Republic           | Homes     | 29 | N.D   | N.D  | -     | N.D   | Vykoukalová et al.,2017 |

-: information not available; N.D.: not detected; DET: detected; MLD: method limit detection.

**Supplementary Table S4.** Biological measurement of exposure, Europe, 2000 -2019.

| Matrix        | Metabolites | Name   | Country | Population                       | Size | Sampling Year | Min    | Max  | Mean    | Median | References               |
|---------------|-------------|--------|---------|----------------------------------|------|---------------|--------|------|---------|--------|--------------------------|
| Urine (ng/ml) | BBOEP       | TBOEP  | Norway  | Mother                           | 42   | -             | <0.6   | -    | <0.6    | <0.6   | Cequier et al.,2014      |
|               | BBOEP       | TBOEP  | Norway  | Children (6-12 years)            | 42   | -             | <0.6   | -    | <0.6    | <0.6   | Cequier et al.,2014      |
|               | BBOEP       | TBOEP  | Norway  | Mother                           | 244  | 2012          | <0.18  | 0.29 | <0.18   | <0.18  | Cequier et al.,2015      |
|               | BBOEP       | TBOEP  | Norway  | Children (6-12 years)            | 112  | 2012          | <0.18  | 1    | 0.19    | <0.18  | Cequier et al.,2015      |
|               | BBOEP       | TBOEP  | Belgium | Adult (23 men and 36 women)      | 59   | -             | -      | 7    | -       | -      | Van den Eede et al.,2013 |
|               | BBOEP       | TBOEP  | Germany | Children (20-80 months)          | 54   | 2011–2012     | -      | -    | 0.36    | 0.16   | Völkel et al., 2018      |
|               | BBOEHBP     | TBOEP  | Germany | Children (20-80 months)          | 54   | 2011–2012     | -      | -    | 0.33    | 0.6    | Völkel et al., 2018      |
|               | DBEP        | TBOEP  | Germany | Children (22-80 months)          | 312  | 2011–2012     | <0.015 | 24.9 | 3.2     | 2      | Fromme et al.,2014       |
|               | BCEP        | TCEP   | Germany | General population (11-68 years) | 30   | 2008          | <0.1   | 27.5 | -       | <0.1   | Schindler et al.,2009    |
|               | BCEP        | TCEP   | Belgium | Adult (23 men and 36 women)      | 59   | -             | -      | 9.5  | -       | -      | Van den Eede et al.,2013 |
|               | DCEP        | TCEP   | Germany | Children (22-80 months)          | 312  | 2011–2012     | <0.1   | 13.1 | 0.4     | 0.2    | Fromme et al.,2014       |
|               | BCPP        | TCIPP  | Germany | General population (11-68 years) | 25   | 2008          | -      | 0.85 | -       | <0.25  | Schindler et al.,2009    |
|               | BCPP        | TCIPP  | Belgium | Adult (23 men and 36 women)      | 59   | -             | -      | 6.2  | -       | -      | Van den Eede et al.,2013 |
|               | DCPP        | TCIPP  | Germany | Children (22-80 months)          | 312  | 2011–2012     | <0.2   | 8.4  | 0.2     | <0.2   | Fromme et al.,2014       |
|               | BDCIPP      | TDCIPP | Norway  | Mother                           | 42   | -             | -      | -    | 0.13 ** | <0.4   | Cequier et al.,2014      |
|               | BDCIPP      | TDCIPP | Norway  | Children (6-12 years)            | 42   | -             | -      | -    | 0.2 **  | -      | Cequier et al.,2014      |
|               | BDCIPP      | TDCIPP | Norway  | Mother                           | 244  | 2012          | -      | 2    | 0.2     | 0.12   | Cequier et al.,2015      |
|               | BDCIPP      | TDCIPP | Norway  | Children (6-12 years)            | 112  | 2012          | -      | 3.7  | 0.33    | 0.23   | Cequier et al.,2015      |
|               | BDCIPP      | TDCIPP | Belgium | Adult (23 men and 36 women)      | 59   | -             | -      | 15   | -       | -      | Van den Eede et al.,2013 |
|               | DEHP        | TEHP   | Germany | Men and women (14-85 years)      | 19   | -             | -      | -    | -       | 1.4    | Reemtsma et al.,2011     |
|               | DEP         | TEP    | Germany | Men and women (14-85 years)      | 19   | -             | -      | -    | -       | 3.2    | Reemtsma et al.,2011     |
|               | DmCP        | TmCP   | Germany | Children (22-80 months)          | 312  | ND            | N.D    | N.D  | N.D     | N.D    | Fromme et al.,2014       |
|               | DmCP        | TmCP   | Germany | General population (11-68 years) | 30   | 2008          | -      | <0.5 | -       | <0.5   | Schindler et al.,2009    |
|               | DBP         | TNBP   | Germany | General population (11-68 years) | 25   | 2008          | -      | 0.26 | -       | <0.25  | Schindler et al.,2009    |
|               | DBP         | TNBP   | Belgium | Adult (23 men and 36 women)      | 59   | -             | -      | 3.5  | -       | -      | Van den Eede et al.,2013 |
|               | DNBP        | TNBP   | Norway  | Mother                           | 42   | -             | <0.4   | -    | <0.4    | <0.4   | Cequier et al.,2014      |
|               | DNBP        | TNBP   | Norway  | Children (6-12 years)            | 42   | -             | <0.4   | -    | <0.4    | <0.4   | Cequier et al.,2014      |
|               | DNBP        | TNBP   | Norway  | Mother                           | 244  | 2012          | <0.12  | 0.49 | <0.12   | <0.12  | Cequier et al.,2015      |
|               | DNBP        | TNBP   | Norway  | Children (6-12 years)            | 112  | 2012          | <0.12  | 0.87 | <0.12   | <0.12  | Cequier et al.,2015      |
|               | DNBP        | TNBP   | Germany | Children (22-80 months)          | 312  | 2011–2012     | <0.1   | 6.6  | 0.3     | 0.2    | Fromme et al.,2014       |
|               | DoCP        | ToCP   | Germany | Children (22-80 months)          | 312  | ND            | N.D    | N.D  | N.D     | N.D    | Fromme et al.,2014       |
|               | DpCP        | TpCP   | Germany | Children (22-80 months)          | 312  | ND            | N.D    | N.D  | N.D     | N.D    | Fromme et al.,2014       |
|               | DpCP        | TpCP   | Germany | General population (11-68 years) | 30   | 2008          | -      | <0.5 | -       | <0.5   | Schindler et al.,2009    |

|             |                             |        |             |                                  |           |           |       |      |         |                       |                          |
|-------------|-----------------------------|--------|-------------|----------------------------------|-----------|-----------|-------|------|---------|-----------------------|--------------------------|
| Hair (ng/g) | DPHP                        | TPHP   | Norway      | Mother                           | 42        | -         | -     | -    | 1.1 **  | -                     | Cequier et al.,2014      |
|             | DPHP                        | TPHP   | Norway      | Children (6-12 years)            | 42        | -         | -     | -    | 0.57 ** | -                     | Cequier et al.,2014      |
|             | DPHP                        | TPHP   | Norway      | Mother                           | 244       | 2012      | -     | 60   | 1.2     | 0.51                  | Cequier et al.,2015      |
|             | DPHP                        | TPHP   | Norway      | Children (6-12 years)            | 112       | 2012      | -     | 135  | 3.2     | 1.1                   | Cequier et al.,2015      |
|             | DPHP                        | TPHP   | Germany     | Children (22-80 months)          | 312       | 2011–2012 | <0.15 | 23.2 | 1.4     | 0.8                   | Fromme et al.,2014       |
|             | DPHP                        | TPHP   | Sweden      | Children (4 years)               | 113       |           | 0.45  | 35   | -       | 1.8                   | Larsson et al.,2014      |
|             | DPHP                        | TPHP   | Germany     | Men and women (14-85 years)      | 19        | -         | -     | -    | -       | 1.3                   | Reemtsma et al.,2011     |
|             | DPHP                        | TPHP   | Belgium     | Adult (23 men and 36 women)      | 59        | -         | -     | 13   | -       | -                     | Van den Eede et al.,2013 |
|             | DPP                         | TPHP   | Germany     | General population (11-68 years) | 30        | 2008      | -     | 5.47 | -       | 0.52                  | Schindler et al.,2009    |
|             |                             | EHDPP  | Norway      | Mother                           | 48        | 2012      | 5     | 265  | -       | 27                    | Kucharska et al.,2015    |
|             |                             | EHDPP  | Norway      | Children                         | 54        | 2012      | 2     | 346  | -       | 21                    | Kucharska et al.,2015    |
|             |                             | TBOEP  | Norway      | Mother                           | 48        | 2012      | 14    | 1253 | -       | 65                    | Kucharska et al.,2015    |
|             |                             | TBOEP  | Norway      | Children                         | 54        | 2012      | 34    | 2411 | -       | 318                   | Kucharska et al.,2015    |
|             |                             | TCEP   | Norway      | Mother                           | 48        | 2012      | <33   | 163  | -       | 72                    | Kucharska et al.,2015    |
|             |                             | TCEP   | Norway      | Children                         | 54        | 2012      | <33   | 118  | -       | 59                    | Kucharska et al.,2015    |
|             |                             | TDCIPP | Norway      | Mother                           | 48        | 2012      | <9    | 3744 | -       | 30                    | Kucharska et al.,2015    |
|             |                             | TDCIPP | Norway      | Children                         | 54        | 2012      | <9    | 2698 | -       | 31                    | Kucharska et al.,2015    |
|             |                             | TMPP   | Norway      | Mother                           | 48        | 2012      | <2    | 134  | -       | 8                     | Kucharska et al.,2015    |
|             |                             | TMPP   | Norway      | Children                         | 54        | 2012      | <2    | 74   | -       | 8                     | Kucharska et al.,2015    |
|             |                             | TNBP   | Norway      | Mother                           | 48        | 2012      | 5     | 672  | -       | 22                    | Kucharska et al.,2015    |
|             |                             | TNBP   | Norway      | Children                         | 54        | 2012      | 3     | 150  | -       | 11                    | Kucharska et al.,2015    |
|             |                             | TPHP   | Norway      | Mother                           | 48        | 2012      | 5     | 1256 | -       | 52                    | Kucharska et al.,2015    |
|             |                             | TPHP   | Norway      | Children                         | 54        | 2012      | 6     | 363  | -       | 63                    | Kucharska et al.,2015    |
|             | Milk (ng/g of lipid weight) | TBOEP  | Spain       | Breast milk                      | 20        | 2015      | <0.03 | 14.8 | 14.8    | 14.8                  | Beser et al.,2019        |
|             |                             | TCEP   | Spain       | Breast milk                      | 20        | 2015      | <0.02 | -    | -       | -                     | Beser et al.,2019        |
| TCIPP       |                             | Spain  | Breast milk | 20                               | 2015      | <0.13     | 12.5  | 12.5 | 12.5    | Beser et al.,2019     |                          |
| TEP         |                             | Spain  | Breast milk | 20                               | 2015      | <0.02     | 7.8   | 4    | 3.4     | Beser et al.,2019     |                          |
| TIPP        |                             | Spain  | Breast milk | 20                               | 2015      | <1.9      | -     | -    | -       | Beser et al.,2019     |                          |
| TMP         |                             | Spain  | Breast milk | 20                               | 2015      | <0.32     | 19    | 19   | 19      | Beser et al.,2019     |                          |
| TNBP        |                             | Spain  | Breast milk | 20                               | 2015      | <0.03     | 10.9  | 10.9 | 10.9    | Beser et al.,2019     |                          |
| TnPrP       |                             | Spain  | Breast milk | 20                               | 2015      | <1.9      | -     | -    | -       | Beser et al.,2019     |                          |
| TPHP        |                             | Spain  | Breast milk | 20                               | 2015      | <0.12     | 17.3  | 12.3 | 9.9     | Beser et al.,2019     |                          |
| BdPhP       |                             | Sweden | Breast milk | 286                              | 1997–2007 | N.D       | -     | -    | N.D     | Sundkvist et al.,2010 |                          |
| dBPhP       |                             | Sweden | Breast milk | 286                              | 1997–2007 | N.D       | -     | -    | N.D     | Sundkvist et al.,2010 |                          |
| EHDPP       |                             | Sweden | Breast milk | 286                              | 1997–2007 | 3.5       | 13    | -    | -6.5    | Sundkvist et al.,2010 |                          |
| TBOEP       |                             | Sweden | Breast milk | 286                              | 1997–2007 | N.D       | 63    | -    | -4.7    | Sundkvist et al.,2010 |                          |
| TCEP        |                             | Sweden | Breast milk | 286                              | 1997–2007 | 2.1       | 8.2   | -    | -4.9    | Sundkvist et al.,2010 |                          |
| TCIPP       |                             | Sweden | Breast milk | 286                              | 1997–2007 | 22        | 82    | -    | -45     | Sundkvist et al.,2010 |                          |
| TDCIPP      |                             | Sweden | Breast milk | 286                              | 1997–2007 | 1.6       | 5.6   | -    | -4.3    | Sundkvist et al.,2010 |                          |
| TMPP        |                             | Sweden | Breast milk | 286                              | 1997–2007 | N.D       | 3.7   | -    | -0.8    | Sundkvist et al.,2010 |                          |
| TNBP        |                             | Sweden | Breast milk | 286                              | 1997–2007 | 3.5       | 13    | -    | -12     | Sundkvist et al.,2010 |                          |
| ToCP        |                             | Sweden | Breast milk | 286                              | 1997–2007 | N.D       | -     | -    | N.D     | Sundkvist et al.,2010 |                          |
| TPHP        |                             | Sweden | Breast milk | 286                              | 1997–2007 | 3.2       | 11    | -    | -8.5    | Sundkvist et al.,2010 |                          |

-. information no available; N.D.:not detected; \*\*: mean calculated with detected measures.
